1 **Title:** Combined morphological and transcriptomic analyses reveal genetic  
2 regulation underlying the species-specific bulbil outgrowth in *Dioscorea alata* L

3 **All authors:** Zhi-Gang Wu<sup>\*1</sup>, Wu Jiang<sup>1</sup>, Zheng-Ming Tao<sup>1</sup>, Xiu-Zhu Guo<sup>1</sup>, Xiao-Jun Pan<sup>2</sup>,  
4 Wen-Hui Yu<sup>3</sup>

5 **Author Affiliations:**

- 6 1. Key Laboratory for Plant Genetic Improvement, Institute of Subtropical Crops, Zhejiang  
7 Academy of Agricultural Sciences, Wenzhou 325005, China  
8 2. School of pharmacy, Wenzhou Medical University, Wenzhou 325035, China  
9 3. Quzhou Academy of Agricultural Sciences, Quzhou 324000, China

10

11

12 **Email address of each author:** wuzhiang177@126.com (ZG.W); jiangwu8888@163.com  
13 (W.J); 623816984@qq.com (ZM. T); 731587020@qq.com (XZ.G); pxj666@163.com (XJ. P);  
14 850254737@qq.com (WH. Y)

15

16 **\* Corresponding author**

17 Pro. Zhi-Gang Wu, email: wuzhigang177@126.com

18

19

20

21 **Length (words) and Structure**

| Introduction | Material and methods | Results | Discussion | Acknowledgements | Total |
|--------------|----------------------|---------|------------|------------------|-------|
| 953          | 942                  | 2541    | 2222       | 33               | 6691  |

22

23 **Figures:** 7

24 **Supporting information:** including 4 supplementary figures and 13 supplementary tables

25

26

27

28

29

30 **Running Title:** Genetic regulation of yam bulbil outgrowth

31 **Highlight:**

32 Transcriptomic data identified multiple functional genes and regulators; long-distance signals  
33 (auxin, CK, ABA), and sucrose as a novel signal play critical roles in controlling bulbil  
34 outgrowth.

35 **Abstract**

36 In yam (*Dioscorea* spp) species, bulbil at leaf axils is the most striking species-specific  
37 axillary structure and exhibits important ecological niches as well as crop yields. Genetic  
38 regulation underlying bulbil outgrowth remain largely unclear. We here first characterized the  
39 development of bulbil from *Dioscorea alata* L. using histological analysis and further  
40 performed full transcriptional profiling on its key developmental stages. Comprehensive  
41 mRNA analyses suggested that long-distance phytohormone signals including auxin, CK and  
42 ABA, play critical roles in controlling the initiation of bulbil through coordinately altering  
43 expression levels of genes involved in localized hormone metabolism and transport. Sucrose  
44 functioned as a novel signal and was required strongly at the early stage of bulbil formation,  
45 thus promoting its outgrowth through up-regulating trehalose-6-phosphate pathway. GO  
46 pathway analysis demonstrated that genes are enriched in biological processes related to light  
47 stimuli, cell division, cell wall modification and carbohydrate metabolism. Particularly, some  
48 novel genes including dioscorin A/B, starch synthetic enzymes and chitinases showed  
49 remarkably high expression levels and strengthened the outgrowth of bulbil. Our data set  
50 demonstrated that the initiation of bulbil was highly regulated by a large number of  
51 transcriptional regulators. RNA in situ hybridization with MYB, WRKY and NAC  
52 transcription factors confirmed their key roles in triggering bulbil initiation. Together, our  
53 findings provide a crucial angle for genetic regulation of controlling the unique reproductive  
54 development of bulbils. Transcriptome data set can serve as a valuable genomic resource for  
55 yam research community or further genetic manipulation to improve bulbil yields.

56 **Key words:** Bulbil, genetic regulation, outgrowth, transcriptome, yam (*Dioscorea alata* L.),  
57 phytohormone signals

58

## 59 **Introduction**

60 Unlike animals, plants are sessile and evolve a high degree of plasticity in architectural forms  
61 to respond to environmental changes (Barthélémy and Caraglio, 2007). Such developmental  
62 plasticity is mainly determined by the shoot branches, which grow from buds, arising the  
63 axillary meristems (AMs) at the axil of leaf primordia (Evers *et al.*, 2011). Axillary branching  
64 is genetically regulated, and generally modified by biotic and abiotic factors to establish a  
65 unique form suitable for the ecological/evolutionary niches in which the plant grows. In many  
66 species, branches or other species-specific axillary structures are key components of  
67 agricultural traits that control the plant biomass and crop yields (Li *et al.*, 2003; Evers *et al.*,  
68 2011).

69

70 Over the past 30 years, most of our understanding in molecular regulatory pathways for plant  
71 branching establishment, is derived from model species such as *Arabidopsis thaliana*, rice and  
72 maize, or from pea (*Pisum sativum*) and rose (*Rosa hybrida*) plants (Gallavotti *et al.*, 2010;  
73 Domagalska and Leyser, 2011). Auxin has been considered as a central signal in controlling  
74 the initiation of axillary meristem (AM) and the regulation of secondary branching (De Smet  
75 and Jürgens, 2007). Two widely accepted hypotheses, auxin transport canalization (ATC) and  
76 the second messenger (SM) models, have been proposed to describe the role of auxin in  
77 regulating the bud development (Prusinkiewicz, *et al.*, 2009). Central to ATC model is that  
78 auxin from shoot apex inhibits the outgrowth of buds, and must be depleted to activate new  
79 AM expansion, in which the establishment of a polar auxin transport (PAT) stream is  
80 essential and driven by a positive expression of PIN efflux proteins (Balla *et al.*, 2011). SM  
81 model contend that auxin does not enter the bud, and regulates the production of branches by  
82 second messengers, which moves directly into the bud to control its activity (Domagalska and  
83 Leyser, 2011). As a good candidate for second messenger, cytokinin (CK) synthesized in the  
84 roots that is regulated negatively by the auxin flow in the main stem, travels to the shoot and  
85 enters the bud where it promotes bud outgrowth (Ferguson and Beveridge, 2009). Important  
86 studies revealed that CK enables buds to escape dormancy by a direct application in many  
87 plants, even in the presence of apical auxin (Elfving and Visser, 2007; Roman *et al.*, 2016).

88 Instead, several reports indicated that abscisic acid (ABA) has a strong negative correlation  
89 with the rate of bud outgrowth, especially in later developmental stages (Reddy *et al.*, 2013;  
90 Yao and Scott, 2015). The ABA-induced inhibition is verified by exogenous ABA application  
91 in decapitated plants (Cline and Oh, 2006). Transgenic experiments disclosed that  
92 ABA-insensitive mutants (*abi1*, *abi2*, *abi3*) in *Arabidopsis* enhance the outgrowth of lateral  
93 buds (Zheng *et al.*, 2015).

94

95 More recently, there is a large body of physiological evidences from many species, supporting  
96 sugar (especially sucrose) as a novel signal required for the triggering of bud outgrowth  
97 (Evers, 2015). Exogenously supplying sucrose in pea plant stimulates the outgrowth of buds  
98 by suppressing the expression of BRANCHED1 (BRC1) inhibitor gene in buds (Mason *et al.*,  
99 2014). The sugar-mediated transduction mechanism has been proposed to be linked to  
100 influence the biosynthesis, transport of certain hormones, such as auxin, CK, and SL, but  
101 remain to be further discovered (Barbier *et al.*, 2015). The plasticity in branches is also highly  
102 sensitive to environmental inputs, especially to light conditions (Kebrom and Mullet, 2015).  
103 An exposure to a low light intensity or a low far-red (R/FR) ratio light inhibits the bud  
104 outgrowth, even when buds are freed from apical dominance (Holalu and Finlayson, 2017).  
105 This suggests that light is essential and acts as a morphogenic signal in triggering bud  
106 organogenesis (Roman *et al.*, 2016). The phenomenon is well characterized in plant shade  
107 avoidance syndrome (SAS), where phytochromes ( especially phy B) perceive and monitor  
108 the low R/FR light, thereby decreasing bud numbers (Reddy *et al.*, 2013). Important  
109 evidences have proved that phy B can transduce largely the effects into changes in expression  
110 of genes associated with hormone biosynthesis and signaling, or bud growth (Reddy and  
111 Finlayson, 2014; Kebrom and Mullet, 2016).

112

113 Despite the considerable advances that have accumulated over many years in model plants,  
114 the full regulatory mechanism remains to be explored to understand the complexity of  
115 branching patterns. Especially for the species-specific axillary organs, the regulatory  
116 pathways is distinct between different species (Evers *et al.*, 2011). The genus *Dioscorea* has  
117 been considered to be among the most primitive of the Angiosperms and differentiated

118 species (Burkill, 1960). In more than 600 members recorded in this genus, the most striking  
119 branch-plasticity is the occurrence of bulbils that are termed as minor storage organs or aerial  
120 branches (aerial tubers), and initiate at their leaf axils (Wickham *et al.*, 1982; Murty, 1983).  
121 Ecologically, this structure enables the plants to spread rapidly and engulf native vegetation  
122 (Mizuki and Takahash, 2009). In practice, yam bulbil serves as an effective means for  
123 vegetative reproduction, and are often dormant and will germinate when drop to the ground in  
124 the following season (Main *et al.*, 2006). In many yam species, aerial bulbils are most  
125 common and have been produced widely as foods or pharmaceutical uses (Fu *et al.*, 2006).  
126 Despite its importance in commercial values and ecological plasticity, the gene regulatory  
127 network throughout bulbil development remain largely unclear. Here, we selected a typical  
128 yam species (*Dioscorea alata* Linn.) and performed full transcriptional profiling on key  
129 developmental stages during bulbil outgrowth by combining morphological analysis. The  
130 expression of genes involved in the control of bulbil outgrowth, including hormone-, sugar-,  
131 light-, and cycle-related genes and other novel genes, was identified to decipher the regulatory  
132 pathway underlying the species-specific bulbil outgrowth. Together, the genome-scale gene  
133 expression profiling investigated provide valuable genomic resources for further biochemical  
134 discovery and functional analysis for yam bulbil development.

## 135 **Materials and methods**

### 136 **Plant materials**

137 The homogenetic seedlings of yam (*Dioscorea alata* L.) were asexually propagated using  
138 severed tubers (100~150 g per plant) from an identical mother plant. The seedlings were  
139 grown in Wenzhou botanical garden (Wenzhou city, Zhejiang province, China) under  
140 standard conditions. The bulbils were seen in the axil of leaf primordia after 130 days growth.  
141 Four staged samples of bulbil were harvested at 0 day after bulbil emergence (0 DAE, labeled  
142 T1), early stage (7 DAE, T2), middle stage (15 DAE, T3), mature stage (35 DAE, T4). Five  
143 plants were collected for each bulbil RNA sample, and then immediately frozen in liquid  
144 nitrogen for Illumina RNA-seq.

### 145 **Histological analyses of bulbil development**

146 Bulbils across the four investigated stages were fixed in FAA solution (70% ethanol: formalin:

147 acetic acid= 90:5:5) for 24 h at 4 °C. The fixed bulbils were dehydrated through a graded  
148 ethanol series, and embedded in paraffin, as described previously (Xing *et al.*, 2010).  
149 Longitudinal sections of 10 µm were prepared with a rotary microtome and stained in  
150 safranin-alcian green according to standard histological procedures (Gutmann,1995). Stained  
151 sections were observed and documented under an OLYMPUS BX60 light microscope  
152 (Olympus, Japan).

### 153 **Determination of sucrose content**

154 Bulbils were ground in liquid nitrogen. Sucrose was extracted with 80% ethanol for 40 min at  
155 60 °C in cap-sealed tubes using 1 mL per 200 mg powder sample. The extraction was carried  
156 out twice with the same condition. The combined suspension was centrifuged at 10,000 g for  
157 10 min at 4 °C. The supernatant was analyzed and sucrose contents were determined with  
158 HPLC- ELSD analysis (Agilent 1200), as described previously (Ma *et al.*, 2014). Five  
159 independent experiments were carried out for each staged bulbils.

### 160 **RNA isolation and sequencing**

161 Total RNA of each bulbil was isolated using TRIzol reagent (Invitrogen) and purified using  
162 DNase1 (TURBO DNase, Ambion, USA). The integrity of RNA (RIN>8.5) was detected  
163 using a Bioanalyzer 2100 (Agilent Technologies, Santa Clara, CA). RNA-seq libraries were  
164 prepared using the cDNA Synthesis kit (Illumina Inc., San Digo, USA) following the standard  
165 Illumina preparation protocol. Paired-end sequencing (2×150 bp) was conducted with  
166 Illumina HiSeq 2500 (Illumina Inc., San Diego, USA) by Biomarker Biotechnology  
167 Corporation (Beijing, China). Three independent biological replicates were analyzed for each  
168 staged samples.

### 169 **Transcript assembly and bioinformatics analysis**

170 The raw reads were refined by removing reads with only adaptor and unknown  
171 nucleotides>10%, and low-quality reads with average Phred quality score<30. The clean  
172 reads were used for robust de novo assembly of a set of transcriptome using Trinity software  
173 package (version R2013-02-25) (Haas *et al.*, 2013). Subsequently, we estimated expression  
174 abundance of each transcript by calculating FPKM value (Fragments per kilobase of exon per  
175 million fragments mapped) using TopHat (version 2.0.8) (Trapnell *et al.*, 2012), and those  
176 with FPKM >1.5 were remained for further analysis. Pearson correlation coefficient of

177 expression levels between three biological replicates was calculated to assess the reliability of  
178 sample collection using cor R package.

179

180 Differentially expressed genes (DEGs) between differentially staged bulbils were identified  
181 using Edge statistical test in terms of the following criteria: false discovery rate (FDR) <0.01,  
182 and an absolute expression fold-change $\geq$ 2 for a given genes between any two staged samples  
183 (Robinson *et al.*, 2010). We annotated biological function for DEGs using NR public  
184 databases according to BLASTX analysis with a cut-off E-value of  $10^{-5}$ . GO slim was  
185 conducted to obtain GO annotations using Blast2GO (Conesa *et al.*, 2005). To obtain enriched  
186 slims, we further performed GO term enrichment analysis using the algorithm and  
187 Kolmogorov-Smirnov (KS) test (P -value $\leq$ 0.001) in R package topGO (Alexa *et al.*, 2006).  
188 Based on all expressed genes (FPKM >1.5), principal component analysis (PCA) was carried  
189 out to explain the relatedness among all staged samples. According to certain functionally  
190 categorical genes, we performed hierarchical cluster analysis (HCA) to present gene  
191 expression pattern using pheatmap library in R software. In addition, transcription factors  
192 (TFs) were identified in terms of Arabidopsis transcription factor database (Perez-Rodriguez  
193 *et al.*, 2010). A P parameter was defined as the expression proportion of certain TF family,  
194 and calculated as described previously (Yu *et al.*, 2015).

### 195 **Validation of Genes Using Quantitative RT-PCR**

196 Quantitative reverse transcription-PCR (qRT-PCR) was performed to verify transcriptomic  
197 profiling results with twenty selected genes. Three biological replicates were conducted for  
198 each gene. The PCR amplification primers for selected genes were designed with Primer3  
199 software, and sequences were listed in Supplementary Table S1. RNA was extracted and  
200 treated as described above. The cDNA was prepared with SuperScript III Reverse  
201 transcriptase (Invitrogen) following the manufacturer's protocol on 1 $\mu$ g of RNA. The  
202 qRT-PCR amplification was run in an ABI 7500 HT (Life technology) with SYBR Green I  
203 Master Mix (TaKaRa), and the reaction mixture and program was carried out as described in  
204 our previous work (Wu *et al.*, 2014). Quantification of gene expression was normalized using  
205 EF-1a gene (Accession: JF825419) as an internal control, and counted according to the  $2^{-\Delta\Delta Ct}$   
206 method (Livak and Schmittgen, 2001).

## 207 **RNA in Situ Hybridization**

208 RNA in situ hybridization was performed using the method described by Siciliano *et al.*  
209 (2007). Each staged bulbils were fix in FAA and embedded in paraffin as described above.  
210 Gene-specific fragments for probe synthesis were amplified by PCR using designed primers:  
211 5'-GAAGAGCACCATGCTGTGAG-3' and 5'-TAATACGACTCACT  
212 ATAGGGCCACATCTCAGCAATCCAG-3' for MYB (Gene ID: c126446.graph-c0),  
213 5'-TGGAGAGCCTTTGATCGGTT-3' and 5'-TAATACGACTCACTATAGGGCCAC  
214 TGCTCTAAACGAAGG-3' for WRKY (c125026.graph\_c1), and 5'-AGTGCAT  
215 TACCTCTGCCGGA-3' and 5'-TAATACGACTCACTATAGGTACCTGGCA  
216 ATTCCCAAGGA-3' for NAC (c116834.graph\_c0). The resulting PCR fragments were used  
217 as templates for synthesis of digoxigenin (DIG)-labeled antisense and sense riboprobes with  
218 the T7/SP6 riboprobe and a DIG-RNA labeling mix (Roche). Sections (8-10  $\mu\text{m}$ ) were treated  
219 with 1  $\mu\text{g mL}^{-1}$  proteinase K for 30 min at 37°C, and then washed under stringent conditions  
220 as described previously (Hsu *et al.*, 2015).

## 221 **Results**

### 222 **Morphology of bulbil during its developmental stages**

223 Yam bulbils are generated naturally on the leaf axil when the main apex stops growing (Fig.  
224 1A). To characterize the developmental process of bulbils in detail, we designed four growing  
225 sequences based on our observation and important publication (Murty and Purnima, 1983),  
226 including the initiation (T1), early (T2), middle (T3) and mature (T4) stages of bulbil  
227 formation (Fig. 1B). At T1 stage, the cells of 2-3 layers below the leaf axil have undergone  
228 periclinal and anticlinal divisions, and further developed into a hump-like meristematic tissue  
229 that is termed as the bulbil primordium (BP). The BP at this stage was pivotal for subsequent  
230 bulbil outgrowth and still remained differentiated in part. Meanwhile, a dome-shaped organ  
231 was visible in the leaf axil. At T2 stage, the cells from BP meristematic zone (Fig. 1H)  
232 became highly meristematic and showed successive cell division and enlargement, further  
233 formed young bulbil. The young bulbil was top-shaped and smooth on the surface, and the  
234 root primordia (RP) was seen in cortical region at this stage (Fig. 1G). At the next stage (T3),  
235 the size of bulbil was enlarged rapidly, as the meristem in the central region of bulbil is



236 continuously widen. Increased cell numbers and enlarged volume by filling starch grains  
237 shaped quasi-round bulbils. The bulbil at this stage had a distinct peripheral region covered by  
238 several rough epiderm layers (Fig. 1B). At T4 stage, the activity of meristematic tissue was  
239 depleted mostly and mature bulbils reached 1.2-3.0 cm in diameter. Multiple RPs were  
240 emerged on bulbil surface, which enable bulbils to spread rapidly in next season. Together,  
241 bulbil morphology at the four developmental stages was distinct.

#### 242 **Transcriptome profiling during bulbil outgrowth**

243 We sequenced 12 RNA libraries from bulbils at its key developmental stages (T1,T2,T3,T4)  
244 based on observation above. All raw reads obtained have been submitted to NCBI under  
245 accession number SRP152752. After stringent data cleanup and quality checks, a high quality  
246 of RNA-Seq data was obtained for each sample with a quantity of 49 million to 66 million  
247 paired-end reads (Supplementary Table S2). The de novo assembly generated 199,270  
248 transcripts, approximately 36% of transcripts were in the size range 200-500 bp  
249 (Supplementary Table S3). The homologous transcripts were further clustered with > 95%  
250 similarity, the final bulbil transcripts generated 97,956 unigenes with a total length of  
251 79,527,036 bp and an average length of 812 bp.

252

253 Based on whole gene expression profile (FPKM values), PCA visualized four stage-specific  
254 clusters with the first two components explaining 77.4% of total variance, and revealed  
255 distinct mRNA populations between different staged bulbils (Fig. 2A ). We identified that 752  
256 ( in T1), 659 (T2), 385 (T3) and 1210 (T4) genes that showed highly stage-specific expression  
257 patterns, but most genes were shared in all staged bulbils (Fig. 2B). Meanwhile, we assessed  
258 gene expression profiles between biological triplicates and they were highly correlated ( $R^2 >$   
259 0.83), indicating that each staged bulbils were well collected (Supplementary Fig. S1). To  
260 confirm the reliability of RNA-seq, we further performed a more rigorous expression measure  
261 for twenty selected genes using qRT-PCR analysis. We disclosed a good agreement with a  
262 high linear correlation ( $R^2 > 0.80$ ; Supplementary Fig. S2) between RNA-seq and qRT-PCR  
263 technologies.

264

265 We further identified a total of 6,112 DEGs in a least one comparison (Supplementary Table  
266 S4, Fig. 2C). These results represented substantial differences in gene expression profiles  
267 during bulbil outgrowth. GO enrichment analysis was carried out to investigate their  
268 biological functions. We found that GO terms including response to abscisic acid, response to  
269 auxin, regulation of meristem growth, starch biosynthetic process, plasma membrane, cell  
270 wall and protein kinase activity, etc, were strikingly enriched ( $P < 0.001$ ) (Supplementary Table  
271 S5). Several significantly enriched ( $P < 0.001$ ) KEGG pathways for DEGs were suggested to  
272 be linked to starch and sucrose metabolism, plant hormone signal transduction, plant circadian  
273 rhythm (Supplementary Table S6, Supplementary Fig. S3). Accordingly, we then focused our  
274 interest on genes participating in these biological functions and metabolic processes.

### 275 **Light Stimuli and Circadian Clock During Bulbil Outgrowth**

276 Several key photoreceptors perceiving the light signaling were here detected, including  
277 phytochrome A (phyA), phytochrome B (phyB) which presented lower expression levels in  
278 T1 and consistently higher levels in T4 (Fig. 3\_I, Supplementary Table S7). For instance,  
279 three genes encoding phyB were up-regulated with an average of 3-fold (s) level in T4 as  
280 compared to T1. As a response to light stimulus, genes such as light-inducible protein (CPRF2)  
281 binding to G-box like motif (5'-ACGTGGC-3'), early light-induced protein (ELIP1)  
282 integrating the light-harvesting chlorophyll system, and light-dependent short hypocotyls  
283 (LSH4, LSH6) promoting cell growth, was activated in T1 and further elevated in subsequent  
284 developmental stages. Additionally, circadian clock regulators including CIRCADIAN  
285 CLOCK-ASSOCIATED 1 (CCA1) and LATE ELONGATED HYPOCOTYL (LHY) had  
286 higher expression levels in T1 as compared to other stages, suggesting that they can gate the  
287 rapidly altered light-quality responses.

### 288 **Differential expression of cell cycle genes during bulbil outgrowth**

289 To better understand the control of cell cycle, we screened for DEGs involved in cell cycle  
290 and growth. We detected some marker genes for the control of cell division in bulbils, such as  
291 A-type, B-type and D-type cyclins (CYCA1, CYCA3, CYCD6), and cyclin-dependent  
292 kinases (CDKF1, CDKF4) (Fig. 3, Supplementary Table 8), which exhibited distinct

293 expression changes. Most cyclins were up-regulated in the initial stage of bulbil formation  
294 (T1) (Fig. 3\_VIII); in contrast, CDKF1 and CDKF4 showed down-regulated in T1 and further  
295 up-regulated in the later stage (T4). In addition, two homologous cyclin-dependent kinase  
296 inhibitor 4 (KRP4) were observed and presented relatively higher expression levels at T2  
297 stage (Fig. 3), which can inhibit CDKs complex activity by phosphorylation and allow S  
298 phase progression (Verkest *et al.*, 2005).

### 299 **Cell wall biosynthesis, modification during bulbil outgrowth**

300 We totally identified 27 DEGs encoding biosynthetic enzymes for the building of primary and  
301 second cell wall (Supplementary Table S9). Of these genes, cellulose synthases or -like  
302 proteins (CESA7/8, CSLD2, CSLE6 ), and protein COBRA (COB, COBL7) (Fig. 3\_III)  
303 showed higher expression levels in T1 compared to other stages. Galacturonosyltransferase or  
304 -like (GAUT3, GAUT7, GAUT14, GATL1, GATL3,etc) were expressed with higher levels in  
305 T2 (Fig. 3\_IV ). It was noted that multiple chitinases (CHI, CHI2, CHI5,etc) showed  
306 extremely high expression levels (> 7,067 FPKM). Unlike the greater part of genes in this  
307 cluster, chitinases exhibited higher expression levels in T3 (Fig. 3\_II). We verified this  
308 expression profiles using qRT-PCR analysis (Supplementary Fig. S2).

309

310 Also, we detected 43 DEGs involved in molecular modification of wall network through  
311 degradation and loosening. For example, genes encoding endo-1,3(4)- b-glucanases  
312 (including EGase, MAN1, MAN9, glycosyl hydrolases family 17) and pectinesterases that  
313 regulate cell wall degradation had the highest expression levels in T1(Fig. 3\_VII). Multiple  
314 xyloglucan endotransglucosylases (XTHs) showed relatively higher expression levels in the  
315 first two stages of bulbil formation (T1, T2) (Fig. 3\_VI), which can loosen some wall-like  
316 networks. Besides XTHs, ten expansins (EXPs), as known cell wall loosening agents, were  
317 identified and most of them were up-regulated at the early stage of bulbil formation (Fig.  
318 3\_V).

### 319 **Starch and sucrose metabolic processes**

320 KEGG enrichment analysis revealed that the pathway of starch and sucrose metabolism was  
321 the most enriched (Supplementary Table S6). We predicted some marker genes involved in

322 starch synthesis, and identified genes encoding ADP glucose pyrophosphorylase (ADPG),  
323 small subunit of Glu-1-P adenylyltransferase (ADG), starch synthase (SS), glucan-branching  
324 enzyme (SBE), granule-bound starch synthase (GBSS). Some of these enzymes showed  
325 strong changes, and their abundances were commonly down-regulated in T1 and sharply  
326 elevated in subsequent stages (Fig. 4). Particularly, SBE1, GBSS and ADG1 were strongly  
327 expressed. Additionally, we examined some genes involved in starch degradation, including  
328 genes encoding  $\alpha/\beta$ -amylases (AMYs, BAMs), isoamylases (ISAs), phosphoglucan water  
329 dikinase (PWD), phosphoglucan phosphatase (PGP), beta-glucosidases (BGs)  
330 (Supplementary Table S10). Of particular interest genes AMY3, BAM9 showed highly  
331 expressed levels. Unlike most starch biosynthetic genes above, the two genes were  
332 up-regulated in T2 and successively down-regulated in T3 and T4.

333

334 Furthermore, there were multiple genes encoding Suc synthases (SUSs), Suc-phosphate  
335 synthases (SPSs), cell wall invertases (CINs) and alkaline/neutral invertases (A/N-INVs),  
336 representing key genes that participate in Suc synthesis and metabolism (Fig. 4A). The levels  
337 of transcripts encoding four SUSs were significantly up-regulated in T1 and gradually  
338 decreased in next stages. Particularly, SUS1(c130514.graph\_c0) showed highly expressed  
339 level with the FPKM value of  $>2,000$ .

340

341 Meanwhile, there were several genes encoding hexokinases (HKs), fructokinases (FPKS),  
342 phosphoglucomutase (PGM), Glu-6-P isomerase (GPIC). Except PGM2 showing a greatly  
343 up-regulated expression level in T4, the genes of HK3/4, FPK1/2 and GPIC had a dramatic  
344 changes and exhibited higher expression levels in T1 stage. Of those genes associated with  
345 Suc metabolism, we detected three INV isoforms and two A/N-INV s that consistently  
346 presented up-regulated expression in T1. More importantly, we observed multiple members of  
347 trehalose-phosphate synthases (TPS) and trehalose-phosphate phosphatase (TPP) gene  
348 families involved in sugar signaling, their expression levels were successively up-regulated  
349 and down-regulated from T1 to T4 stage, respectively.

350

351 Given the importance of triggering axillary branch outgrowth by Suc, we further detected the

352 expression levels of some key enzymes involved in Suc metabolism by qRT-PCR technology  
353 (Fig. 4B), and determined Sus accumulation in bulbils by detecting Suc contents (Fig. 4C).  
354 The genes SUS1, SUS1-like, and INV presented peak expression profiles in T1, which were  
355 consistent with that of transcriptomics analyses. We found that Suc was sharply accumulated  
356 in T1 and increased slowly in next stages.

### 357 **Dioscorin gene expression during bulbil outgrowth**

358 We identified two members of dioscorin (Dio) family, DioA (c130377.graph\_c3) and DioB  
359 (c135265.graph\_c3) encoding dioscorin protein. Phylogenetic analysis demonstrated that the  
360 two genes had high similarity with Dio sequences from other *Dioscorea* species  
361 (Supplementary Fig. S4) (Conlan, *et al.*, 1998; Xue *et al.*, 2012). It is noticeable that the two  
362 genes were expressed at fantastically high levels with >18,246 FPKM for DioA over bulbil  
363 outgrowth, and >9,878 FPKM for DioB. Both of them had increasingly expressed abundances  
364 during bulbil outgrowth. This expression changes were confirmed by qRT-PCR analysis  
365 (Supplementary Fig. S2).

### 366 **Transcriptional profiles of auxin synthesis, transport, and signaling components**

367 To investigate the hormonal regulation during bulbil outgrowth, we analyzed the expression  
368 of genes involved in auxin biosynthesis, transport, and signaling (Fig. 5, Supplementary Table  
369 S11). We detected 12 auxin biosynthetic enzymes that were differentially expressed. Most of  
370 genes, including three TRYPTOPHAN SYNTHASE Alpha/ Beta (TSA, TSA-like, TSB1),  
371 two TRYPTOPHAN AMINOTRANSFERASE RELATED2/3 (TAR2, TAR3) and two  
372 FLAVIN-CONTAINING MONOOXYGENASES (YUCCA1), had higher expression levels  
373 in T1 relative to other stages (Fig. 5A). In addition, two INDOLE-3-ACETIC ACID-AMIDO  
374 SYNTHETASES (GH3.5, GH3.8) presented up-regulated expression in T1, which can  
375 catalyze the synthesis of IAA- amino acid conjugates (IAA-R) and provide a mechanism for  
376 depleting excess auxin in bulbils.

377

378 Most auxin transporters showed increased expression levels in T1 relative to other stages (Fig.  
379 5B). For instance, the expression levels of influx carrier protein TORNADO 1 (TRN1),  
380 transmembrane-targeted efflux carrier PIN1, other efflux carriers such as ATP-binding

381 cassette subfamily (ABCB)-type transporters peaked in T1. In particular, ABCB19  
382 (c133592.graph\_c0) encoding P-glycoprotein (PGM) that regulates the polar auxin basipetal  
383 transport (Mravec *et al.*, 2008), was highly expressed (154 FPKM) in T1 and sharply  
384 decreased to 54 FPKM in T2. Instead, only two ABCB transporters (ABCB4, ABCB19) were  
385 up-regulated in T4 at weak levels less than 15 FPKM.

386

387 Based on HCA, several key components of auxin signaling including AUX/IAA co-receptors,  
388 auxin-repressed protein (ARP), and ARF transcription factor binding with TGTCTC auxin  
389 response element (AuxRE), were grouped into two categories, and showed distinct expression  
390 patterns (Fig. 5C). Group I genes were more highly expressed in T4 relative to other stages.  
391 By contrast, group II displayed higher expression levels at the early stages (T1,T2). Among  
392 these genes, IAA and AFBs genes were widely expressed. Specially, ARF6 and IAA15  
393 exhibited relatively higher expression levels, which have been implicated in axillary shoot  
394 development in potato and tomato (Faivre-Rampant *et al.*, 2004; Deng *et al.*, 2012).

### 395 **Expression patterns of other plant hormone-related genes**

396 We also conducted a profile analysis of genes that involved in other major hormones  
397 metabolism and signaling (Supplementary Table S11). We observed some genes encoding  
398 CK-deactivating gene, cytokinin oxidase 1/dehydrogenase (CKX1, CKX3, CKX9), and  
399 cytokinin ribosides (LOG1, LOG4) responsible for CK biosynthesis and catabolism. Most of  
400 them exhibited up-regulated expression levels in T1. In contrast, a gene encoding  
401 equilibrative nucleotide transporter 3 (ENT3) was highly expressed in T2 but was then  
402 strongly down-regulated in T4, which participates in CK transport. Multiple CK receptor  
403 genes encoding Histidine kinases (AHKs) and CK-inducible two-component response  
404 regulators (ARRs) were observed; they were up-regulated in T1 at moderate expression  
405 levels.

406

407 In addition, seven genes encoding zeaxanthin epoxidases (ZEPs) responsible for ABA  
408 biosynthesis were weakly expressed and showed down-regulated in T1 and then up-regulated  
409 in T4. Furthermore, we observed a set of ethylene-related genes, including biosynthetic genes

410 encoding 1-aminocyclopropane-1-carboxylate oxidases (ACOs), receptor genes such as RTE1,  
411 EIN2 and EIN4, as well as transcriptional regulators (EFRs). Specially, genes EFR1, EFR2,  
412 EFR071 were highly expressed in T1 or T2 but were then strongly down-regulated in T4,  
413 demonstrating that the ethylene-inducible genes can be timely activated at the early stage of  
414 bulbil outgrowth. Similarly, several key genes in JA biosynthesis were also expressed with  
415 higher levels in the early stages (T1,T2) than in the later stages (T4). For example, FAD7,  
416 AOS1 and LOX6 that encode respectively omega-3 fatty acid desaturase, allene oxide  
417 synthase 1 and lipoxygenase, had the highest expression levels in T1. Additionally, a few  
418 DEGs involved in SA biosynthesis and signaling were identified and expressed at low levels,  
419 including genes encoding isochorismate synthase 2 (ICS2), SA-receptor proteins (SABP2,  
420 NPR1). both of them showed weak expression changes among different stages.

#### 421 **Genes encoding transcription factors (TFs)**

422 We observed 215 genes encoding for TFs that showed differentially expressed during bulbil  
423 outgrowth, and most of them were from AP2/ERF, WRKY, bHLH, NAC, MYB,  
424 MYB-Related, C2H2, C3H families (Supplementary Table 12). Given the fact that members  
425 in identical TF family may share similar functions, we calculated the expression proportion (P)  
426 of each TFs family relative to total expression level of all families over bulbil developmental  
427 stages (Supplementary Table 13). We found that AP2/ERF family showed highly expressed  
428 ( $P>5.7\%$ ), and families of C3H, WRKY, bZIP, NAC, bHLH and MYB, were moderately  
429 highly expressed ( $P>1.0\%$ ), suggesting that these families may play a more prominent role  
430 during bulbil outgrowth.

431

432 To display TFs expression profiles in detail, we clustered members of all TFs families into  
433 four distinct groups that represent four stage-specific expression patterns (Fig. 6). In cluster I,  
434 both of five members from C2H2 and C3H families exhibited specific expression and were  
435 strongly up-regulated in T4. In cluster II, 11 members of WRKY family represented a  
436 function category and showed dramatically increased expression in T2. Furthermore,  
437 AP2/ERF (14 members) and NAC (4 members) families were overrepresented in cluster III,  
438 both of which peaked in T3 stage. The enrichment of five members of MYB family was



439 observed in cluster IV, these members showed strongly up-regulated in T1. To further explore  
440 the role of transcriptional regulators, we selected three TFs of MYB (C126446.graph-c0),  
441 WRKY (C125026.graph\_c1) and NAC (C116834.graph\_c0 ) due to their higher expression  
442 levels , and examined their expression patterns by in situ hybridization (Fig. 7). Consistent  
443 with the RNA-seq results, we found that all of them were specifically expressed in the AM  
444 initiation zone (a dome-shaped tissue) at T1 stage, and accumulated gradually decreased  
445 chromogenic signals in subsequent developmental stages, indicating key roles that play during  
446 bulbil initiation.

## 447 **Discussion**

### 448 **Functional gene sets associated with yam bulbil outgrowth**

449 Our transcriptome profiles confirmed that large sets of genes changed differentially between  
450 yam bulbil developmental processes, demonstrating these data can serve as resources to  
451 identify functional genes related to bulbil outgrowth. As shown in Figure 3\_I, the gene cluster  
452 analysis showed the presence of a set of genes encoding photoreceptors including phy A, phy  
453 B and phototropins, which were strongly down-regulated in the young bulbil (T1). The  
454 function of the gene set (especially phyB) has been linked to a role of regulating the network  
455 of interacting light and hormones (Reddy, *et al.*, 2013; Roman *et al.*, 2016). Experiments in  
456 *Arabidopsis* has shown that phyB requires intact auxin signalling pathway to repress bud  
457 activity (Finlayson *et al.*, 2010). Here, the outgrowth of young bulbils benefited from the  
458 inhibition of Phy B genes in the early stage. The result is in agreement with observations  
459 reported previously in sorghum plants (Kebrom *et al.*, 2006; Kebrom and Mullet, 2016).

460

461 Another gene set is mainly represented by some cell cycle-related genes including CYCA1,  
462 CYCA3, CYCD6, CDKF1and CDKF4 (Supplementary Table S8). In the control of axillary  
463 buds, cell cycle-related genes performs a quality control function in promoting the resumption  
464 of meristem organogenic activity. The fact is directly supported by a variety of experiments  
465 that, increased gene expression of cell cycle in dormant buds from pea and *Arabidopsis* by  
466 decapitation stimulates bud outgrowth (Devitt and Stafstrom, 1995; Shimizu and Mori, 1998).  
467 Similar evidence has shown that the expression of several cell cycle genes (CYCB, CYCD2,



468 CDKB) is decreased largely in sorghum buds by defoliation (Kebrom *et al.*, 2010). In this  
469 study, a large set of cell cycle genes were strongly up-regulated in T1(Fig. 3VIII). This  
470 expression profile of genes increases the vitality of cell division in leaf primordia meristems  
471 and allows the resumption of organogenesis of young bulbils.

472

473 Meanwhile, several lines of evidences suggest that the expression of cell wall expansion  
474 related genes such as EXPANSINS, determines the rate of the initiation and elongation of  
475 premature axillary meristem and exerts a profound influence on plant development and  
476 morphology (Fleming *et al.*, 1997). In a reported experiment from *Petunia hybrid* plant,  
477 over-expression of PHEXPA1 gene promotes axillary meristem release, whereas silencing  
478 PHEXPA1 produces opposite phenotypes (Zenoni *et al.*, 2011). The enhanced expression of  
479 RhEXP by CK signal activates the SAM organogenic activity in rose axillary buds and further  
480 promotes the bud elongation (Roman *et al.*, 2016). Consistent with these observations, we  
481 detected 11 gene set of EXPANSINS from EXPA and EXPB families, and found a distinctly  
482 up-regulated expression pattern in T1 (Fig. 3\_V). Such result may be explained that the gene  
483 set of EXPANSINS contributes a unique role of maintaining cell enlargement during bulbil  
484 outgrowth and of building the special architecture form.

485

486 Starch constitutes most of the biomass of mature bulbil, accounting for 50-80% of its dry  
487 matter, and is a main trait being improved by breeding (Tamiru *et al.*, 2008). As expected, we  
488 observed a set of ten marker genes involved in starch biosynthesis pathway (Supplementary  
489 Table S10, Fig. 4). Of particular interest is SBE and GBSS, which showed high expression  
490 levels in the later stages of bulbil formation (T3 and T4). This results are consistent with  
491 previous observation in maize embryo and endosperm development (Chen *et al.*, 2014).

492

493 In addition to these conserved genes reported previously in axillary bud growth, we also focus  
494 genes that are highly expressed and specific to bulbil outgrowth. For example, two genes of  
495 Dio A and Dio B from Dio family encoding dioscorin protein showed successively increased  
496 expression profiles with extremely high levels (>9,878 FPKM) and, are homologous with  
497 some members cloned in other *Dioscorea* plant species (Xue *et al.*, 2012). Dioscorin is the

498 major storage protein and specific in tuber and bulbil from *Dioscorea* plants, which can  
499 support the new plant growth during germination or sprouting by supplying nitrogen (Xue *et*  
500 *al.*, 2015). This finding strengthens the specialized role of Dio genes in bulbil outgrowth,  
501 implying that bulbil outgrowth can be somewhat understood to be the process of dioscorin  
502 protein accumulation.

### 503 **Bulbil outgrowth requires the coordinated control of Hormone-Related Genes**

504 Understanding the expression of genes encoding integral components of hormone  
505 biosynthesis, metabolism or signaling facilitates efficient and directional links to hormone  
506 involvement during bulbil outgrowth. Here, the expression of genes encoding TSA/TAB,  
507 TAR and YUCCA enzymes involved in auxin biosynthesis were highly up-regulated in T1,  
508 suggesting that the produce of auxin is localized in bulbils in this stage. Consistent with our  
509 observation, localized auxin biosynthesis is required for axillary meristem initiation in maize  
510 and in Arabidopsis (Gallavotti *et al.*, 2008; Zhao, 2010). Knockout of YUCCA genes leads to  
511 fewer branches due to the absence of axillary meristem (Cheng *et al.*, 2006). On the other  
512 hand, ATC model supports that auxin need to be exported from axillary buds for its outgrowth  
513 by establishing the localized PAT steam in bud stem (not in main stem) (Blilou *et al.*, 2005).  
514 The PAT steam is driven by PIN proteins belonging to a family of auxin efflux carriers that  
515 can facilitate auxin export out of cells (Petrášek and Friml, 2009). Arabidopsis mutants with  
516 more axillary growth increase PIN protein levels and the amount of auxin moving by PAT  
517 steam (Prusinkiewicz *et al.*, 2009). In pea plant, increased auxin export from buds is  
518 accompanied by PIN1 polarization after decapitation, and further activates bud outgrowth  
519 (Balla *et al.*, 2011). In accordance with these evidences, we observed the highly increased  
520 expression levels of multiple auxin efflux proteins including PIN and ABCB -type  
521 transporters in T1 stage (Fig. 4B), whereby these transport proteins facilitate transporting  
522 excess axuin and trigger bulbil outgrowth.

523

524 Outgrowth of axillary buds is positively correlated with CKs levels that are inhibited by the  
525 moving auxin in main stem (Ferguson and Beveridge, 2009; Domagalska and Leyser, 2011).  
526 The CK levels in chickpea buds increase 25-fold after decapitation, suggesting that CKs are

527 necessary to initiate bud outgrowth (Turnbull *et al.*, 1997). In some cases , CKs can stimulate  
528 bud outgrowth by a direct application to buds, even in the presence of apical auxin (Dun *et al.*,  
529 2012). In phy B sorghum mutants, reduced expression of genes involved in CK biosynthesis,  
530 and signaling leads to the resistance to bud outgrowth (Kebrom and Mullet, 2016). Mutations  
531 in rice CYTOKININ OXIDASE (CKX) that degrades CK, give rise to increased panicle  
532 branches and spikelet numbers in inflorescence (Ashikari *et al.*, 2005). Conversely, mutations  
533 for CK-biosynthetic gene (LONELY GUY) in rice produce fewer branches (Kurakawa *et al.*,  
534 2007). In our study, we revealed the activation of CK synthesis genes (LOG1, LOG4) and the  
535 repression of degradation genes (CKX1, CKX3, CKX6, etc.) in bulbils at T1 stage  
536 (Supplementary Table S11). Also, an increased expression of CK transporter (ENT3) showed  
537 highly up-regulated in T1, which facilitates the CK flow from main stem to bulbils. Taken a  
538 whole, the expression of CK-related genes above could drive the promotion of bulbil  
539 outgrowth at the initiation stage.

540

541 ABA has also been thought to be a key component of regulating axillary organ growth. From  
542 a variety of plant species, the decline of ABA levels after decapitation precedes the onset of  
543 bud outgrowth (Zheng *et al.*, 2015). In Arabidopsis, elevated ABA delays bud outgrowth and  
544 decreases elongating buds under low R:FR condition (Reddy *et al.*, 2013; Yao and Scott,  
545 2015). Several hypotheses has been postulated that ABA acts downstream of auxin and SL,  
546 possibly as a second messenger (Cline and Oh, 2006; López-Ráez *et al.*, 2010). Independently  
547 of the presumption, it is undoubted that increased expression of genes involved in ABA  
548 biosynthesis is linked to repression of axillary bud growth. Consistent with previous reports,  
549 our data revealed that seven ABA synthesis genes (ZEP) are down-regulated in T1 and then  
550 strongly up-regulated in T4; and the degradation gene (CYP707A) exerted a reverse  
551 expression profile (Supplementary Table S11). Therefore, it is possible that these genes  
552 decreased ABA accumulation in bulbils at the initiation stage, thereby promoting bulbil  
553 outgrowth.

#### 554 **Sucrose accumulation is the key for bulbil outgrowth**

555 In addition to phytohormone signals, sugar (sucrose or analogues) as a novel player,

556 contributes to the activation of axillary buds growth. In diverse plant species after  
557 decapitation, the progressive decrease of auxin levels in stem is too slowly to dominate the  
558 early bud formation, whereas sugars are speedily redistributed and enter buds to promote  
559 them growth (Barbier *et al.*, 2015). Form a representative experiment in pea plant, the rate of  
560 polar auxin transport is  $1\text{ cm}\cdot\text{h}^{-1}$  when loss of apical dominance, yet the outgrowth of bud  
561 reaches 40 cm at 2.5 h after decapitation (Mason *et al.*, 2014). In our study, the rapidly  
562 accumulated rate of sucrose was observed in T1 (Fig. 4C), it is benefit to trigger the release of  
563 bulbils. Meanwhile, transcriptome analysis revealed that the expression of key genes (SUSs,  
564 CINs) involved in sucrose biosynthesis were highly up-regulated in the young bulbils (T1),  
565 which can timely unchoke the process of sucrose supply. More importantly, increased CIN  
566 expression can positively regulate axillary bud initiation by generating sugars for trophic  
567 uptake under interplay of light and phytohormones (Rabot *et al.*, 2014).

568

569 On the other hand, sucrose functions as a critical signal through regulating the pathways  
570 involving T6P, HXK1 (O'Hara *et al.*, 2013). Over-expressed HXK1 Arabidopsis lines show  
571 enhanced branching (Kelly *et al.*, 2012). Particularly, the elevated T6P level has been  
572 implemented to be the signal that sugars increase influx into buds after decapitation, whereby  
573 buds from dormancy are released and elongated (Yadav *et al.*, 2014; Figueroa and Lunn,  
574 2016). T6P is synthesized by TPS and dephosphorylated to TPP. Over-expression of *E. coli*  
575 TPS (OtsA) in Arabidopsis results in the rise of T6P levels and further triggers the  
576 proliferation of shoot branching; instead, over-expression of *E. coli* TPP (OtsB) decreases  
577 both T6P levels and shoot branching (Schluepmann *et al.*, 2003). Similar evidence  
578 demonstrated that constitutively affected Arabidopsis lines in synthesis and degradation of  
579 T6P, increases and reduces branching phenotypes, respectively (Yadav *et al.*, 2014). In  
580 garden pea, T6P was attested as the signal of sucrose availability to promote outgrowth of  
581 axillary buds (Fichtner *et al.*, 2017). In our study, we observed a successive up-regulated and  
582 down-regulated expression for TPS and TPP genes from T1 to T4 (Supplementary Table 11),  
583 which is more likely a consequence of enhanced sucrose signaling. These up-regulated TPS  
584 genes could increase T6P levels, thereby contributing to the promotion of bulbil outgrowth.

585 **Initiation of bulbil specifically expresses a large number of TF genes**

586 The initiation of AMs is tightly linked to the activity of bud-specific regulators. Most of these  
587 genes belong to members of multiple TFs families, including R2R3 MYB proteins  
588 (REGULATOR OF AXILLARY MERISTERMS, RAX) from Arabidopsis, NAC domain  
589 TFs (CUP-SHAPED COTYLENONS, CUCs), a WRKY domain protein (EXCESSIVE  
590 BRANHES1, *EXBI*), GRAS domain proteins ( LATERAL SUPPRESSOR, *LS*) in tomato,  
591 and TCP TFs (BRANCHED1/2, *BRC1/2* ) in Arabidopsis and in sorghum (*TBI*) (Janssen *et*  
592 *al.*, 2014; Yang and Jiao, 2016). Genetic studies from mutant plants have demonstrated that  
593 these transcriptional activators are specifically expressed in the boundary zone between leaf  
594 primordium and SAM, and control the fate of AMs initiation and the production of branches  
595 (Keller *et al.*, 2006; Yang *et al.*, 2012; Guo *et al.*, 2015). For instance, loss of RAX1 gene  
596 encoding MYB37 in Arabidopsis, or its orthologous gene *BLIND* (*BL*) in tomato, fails to  
597 generate lateral buds during vegetative development, indicating the function of these genes  
598 being conserved (Keller *et al.*, 2006; Naz *et al.*, 2013). Similarly, WRKY TFs have been  
599 implicated in the control of axillary meristem (AM) initiation by transcriptionally  
600 regulating RAX genes. Over-expression of *EXBI* encoding WRKY71 increases excessive  
601 AM initiation and bud activities and, produces bushy and dwarf phenotypes (Guo *et al.*,  
602 2015).

603

604 In this study, we found that GO terms " positive regulation of transcription "( $P=8.6 \text{ E-}12$  )  
605 and" regulation of meristem growth"( $P=6.0 \text{ E-}8$  ) were significantly enriched in DEGs  
606 (Supplementary Table S5). We verified a large set of TFs genes over bulbil developmental  
607 stages, especially from members of AP2/ERF, WRKY, NAC, bHLH and MYB families (Fig.  
608 6). Three representative TFs from WRKY, NAC and MYB were further confirmed to be  
609 highly expressed in the meristematic cell zone at the early stage of bulbil formation (Fig. 7).  
610 These data suggested that transcriptional regulators are required for the early step of bulbil  
611 expansion. However, the downstream genes that are controlled by them, still need to be  
612 explored by genetic approaches in future studies.

613

614 In conclusion, we have highlighted that long-distance signals (auxin, CK and ABA) play  
615 critical roles in controlling the bulbil formation from leaf primordium to outgrowth. Sucrose  
616 as a critical signal is strongly required at the early stage of bulbil formation through  
617 upregulating the T6P pathway. We have identified large sets of functional genes responsible  
618 for bulbil outgrowth, including genes related to light stimuli, cell division, cell wall  
619 modification and carbohydrate metabolism. Remarkably, some of these genes are novel and  
620 deserve special attention because of their extremely high expression levels, including Dio A/B  
621 proteins, starch synthetic enzymes and chitinases, which may be utilized to improve yam  
622 breeding program by genetic manipulation. Also, we have described the key role in triggering  
623 bulbil initiation regulated by transcriptional regulators. Overall, our work presented here  
624 allows, to our knowledge for the first time, a full overview of transcriptomic profiling for yam  
625 bulbil outgrowth, and provides key genetic factors underlying bulbil outgrowth regulation.

## 626 **Acknowledgements**

627 This study was supported by Zhejiang Provincial Key Laboratory for Genetic Improvement  
628 and Quality Control of Medicinal Plants (No. 2011E10015) in China, and  
629 Zhejiang Provincial Applied Research Program for Commonweal Technology (No.  
630 2016C32SA300040).

## 631 **Author contributions**

632 ZG.W conceived the program and designed the experiment, and supervised the writing. W. J  
633 analyzed the transcriptome data and copied with the figures. ZM. T, XZ. G and WH. Y  
634 performed most of the experiments and wrote the manuscript with their contributions. XJ. P  
635 helped to analyze bioinformatics. All authors read and approved the final manuscript.

636

637

638

## 639 **Supplementary data**

- 640 Supplementary data are available at *JXB* online.
- 641 **Fig. S1.** Pearson correlation relationship between biological replicates.
- 642 **Fig. S2.** Validations of gene expression profiles by qRT-PCR.
- 643 **Fig. S3.** Enriched KEGG pathways.
- 644 **Fig. S4.** Phylogenetic analysis for Dio A and Dio B genes.
- 645 **Fig. S5.** Expression dynamics of TF families.
- 646 **Table S1.** List of the primer sequences used in this study.
- 647 **Table S2.** Summary of RNA-seq reads in this study.
- 648 **Table S3.** Assembly statistics for the bulbil transcriptome.
- 649 **Table S4.** Lists of differentially expressed genes.
- 650 **Table S5.** List of significantly enriched top GO terms.
- 651 **Table S6.** Lists of significantly enriched KEGG pathways.
- 652 **Table S7.** Expression of genes related to light stimuli and circadian clock.
- 653 **Table S8.** Expression of genes related to cell cycle.
- 654 **Table S9.** Expression of genes related to cell wall biosynthesis, modification and loosening.
- 655 **Table S10.** Expression of genes related to carbohydrate metabolism and sucrose signaling.
- 656 **Table S11.** Expression of genes related to hormone metabolism, transport and signaling.
- 657 **Table S12.** Lists of differentially expressed TFs.
- 658 **Table S13.** The expression proportion of the identified TF families.

## References

- Alexa A, Rahnenführer J, Lengauer T.** 2006. Improved scoring of functional groups from gene expression data by decorrelating GO graph structure. *Bioinformatics* **22**, 1600-1607.
- Ashikari M, Sakakibara H, Lin S, Yamamoto T, Takashi T, Nishimura A, Angeles ER, Qian Q, Kitano H, Matsuoka M.** 2005. Cytokinin oxidase regulates rice grain production. *Science* **309**, 741-745.
- Balla J, Kalousek P, Reinöhl V, Friml J, Procházka S.** 2011. Competitive canalization of PIN-dependent auxin flow from axillary buds controls pea bud outgrowth. *The Plant Journal* **65**, 571-577.
- Barbier FF, Péron T, Lecerf M, et al.** 2015. Sucrose is an early modulator of the key hormonal mechanisms controlling bud outgrowth in *Rosa hybrida*. *Journal of Experimental Botany* **66**, 2569-2582.
- Barthélémy D, Caraglio Y.** 2007. Plant architecture: a dynamic, multilevel and comprehensive approach to plant form, structure and ontogeny. *Annals of Botany* **99**, 375-407.
- Blilou I, Xu J, Wildwater M, Willemsen V, Paponov I, Friml J, Heidstra R, Aida M, Palme k, Scheres B.** 2005. The PIN auxin efflux facilitator network controls growth and patterning in *Arabidopsis* roots. *Nature* **433**, 39-44.
- Burkill IH.** 1960. The organography and the evolution of Dioscoreaceae, the family of the yams. *Botanical Journal of the Linnean Society* **56**, 319-412.
- Chen J, Zeng B, Zhang M, Xie S, Wang G, Hauck A, Lai J.** 2014. Dynamic transcriptome landscape of maize embryo and endosperm development. *Plant Physiology* **166**, 252-264.
- Cheng Y, Dai X, Zhao Y.** 2006. Auxin biosynthesis by the YUCCA flavin monooxygenases controls the formation of floral organs and vascular tissues in *Arabidopsis*. *Gene & Development* **20**, 1790-1799.
- Cline MG, Oh C.** 2006. A Reappraisal of the role of abscisic acid and its interaction with auxin in apical dominance. *Annals of Botany* **98**, 891-897.
- Conesa A, Götz S, García-Gómez JM, Terol J, Talón M, Robles M.** 2005. Blast2GO: a universal tool for annotation, visualization and analysis in functional genomics research. *Bioinformatics* **21**, 3674-3676.
- De Smet I, Jürgens G.** 2007. Patterning the axis in plants—auxin in control. *Current Opinion in Genetics & Development* **17**, 337-343.
- Deng W, Yang Y, Ren Z, Audran-Delalande C, Mila I, Wang X, Song H, Hu Y, Bouzayen M, Li Z.** 2012. The tomato SHAA15 is involved in trichome formation and axillary shoot development. *New Phytologist* **194**, 379-390.



- Devitt ML, Stafstrom JP.** 1995. Cell cycle regulation during growth-dormancy cycles in pea axillary buds. *Plant Molecular Biology* **29**, 255-265.
- Domagalska MA, Leyser O.** 2011. Signal integration in the control of shoot branching. *Nature Reviews Molecular Cell Biology* **12**, 211-221.
- Dun EA, de Saint Germain A, Rameau C, Beveridge CA.** 2012. Antagonistic action of strigolactone and cytokinin in bud outgrowth control. *Plant Physiology* **158**, 487-498.
- Elfving DC, Visser DB.** 2007. Improving the efficacy of cytokinin applications for stimulation of lateral branch development in young sweet cherry trees in the orchard. *HortScience* **42**, 251-256.
- Evers JB.** 2015. Sugar as a key component of the shoot branching regulation network. *Plant, Cell & Environment* **38**, 1455-1456.
- Evers JB, van der Krol AR, Vos J, Struik P C.** 2011. Understanding shoot branching by modelling form and function. *Trends in Plant Science* **16**, 464-467.
- Faivre-Rampant O, Cardle L, Marshall D, Viola R, Taylor MA.** 2004. Changes in gene expression during meristem activation processes in *Solanum tuberosum* with a focus on the regulation of an auxin response factor gene. *Journal of Experimental Botany* **55**, 613-622.
- Ferguson BJ, Beveridge CA.** 2009. Roles for auxin, cytokinin, and strigolactone in regulating shoot branching. *Plant Physiology* **149**, 1929-1944.
- Fichtner F, Barbier FF, Feil R, Watanabe M, Annunziata MG, Chabikwa TG, Höfgen R, Stitt M, Beveridge CA, Lunn JE.** 2017. Trehalose 6-phosphate is involved in triggering axillary bud outgrowth in garden pea (*Pisum sativum* L.). *The Plant Journal* **92**, 611-623.
- Figueroa CM, Lunn JE.** 2016. A tale of two sugars: trehalose 6-phosphate and sucrose. *Plant Physiology* **172**, 7-27.
- Finlayson SA, Krishnareddy SR, Kebrom TH, Casal JJ.** 2010. Phytochrome regulation of branching in Arabidopsis. *Plant Physiology* **152**, 1914-1927.
- Fleming AJ, McQueen-Mason S, Mandel T, Kuhlemeier C.** 1997. Induction of leaf primordia by the cell wall protein expansin. *Science* **276**, 1415-1418.
- Fu YC, Ferng LHA, Huang PY.** 2006. Quantitative analysis of allantoin and allantoic acid in yam tuber, mucilage, skin and bulbil of the *Dioscorea* species. *Food Chemistry* **94**, 541-549.
- Gallavotti A, Barazesh S, Malcomber S, Hall D, Jackson D, Schmidt RJ, McSteen P.** 2008. Sparse inflorescence1 encodes a monocot-specific YUCCA-like gene required for vegetative and reproductive development in maize. *Proceedings of the National Academy of Sciences of the United States of America* **105**, 15196-15201.

- Gallavotti A, Long JA, Stanfield S, Yang X, Jackson D, Vollbrecht E, Schmidt RJ.** 2010. The control of axillary meristem fate in the maize ramosa pathway. *Development* **137**, 2849-2856.
- Guo D, Zhang J, Wang X, et al.** 2015. The WRKY transcription factor WRKY71/EXB1 controls shoot branching by transcriptionally regulating RAX genes in Arabidopsis. *The Plant Cell* **27**, 3112-3127.
- Gutmann M.** 1995. Improved staining procedures for photographic documentation of phenolic deposits in semithin sections of plant tissue. *Journal of Microscopy* **179**, 277-281.
- Haas BJ, Papanicolaou A, Yassour M, et al.** 2013. De novo transcript sequence reconstruction from RNA-seq using the Trinity platform for reference generation and analysis. *Nature Protocols* **8**, 1494-1512.
- Holalu SV, Finlayson SA.** 2017. The ratio of red light to far red light alters Arabidopsis axillary bud growth and abscisic acid signalling before stem auxin changes. *Journal of Experimental Botany* **68**, 943-952.
- Hsu CC, Chen YY, Tsai WC, Chen WH, Chen HH.** 2015. Three R2R3-MYB transcription factors regulate distinct floral pigmentation patterning in *Phalaenopsis* spp. *Plant Physiology* **168**, 175-191.
- Janssen BJ, Drummond RS, Snowden KC.** 2014. Regulation of axillary shoot development. *Current Opinion in Plant Biology* **17**: 28-35.
- Kebrom TH, Burson BL, Finlayson SA.** 2006. Phytochrome B represses Teosinte Branched1 expression and induces sorghum axillary bud outgrowth in response to light signals. *Plant Physiology* **140**, 1109-1117.
- Kebrom TH, Brutnell TP, Finlayson SA.** 2010. Suppression of sorghum axillary bud outgrowth by shade, phyB and defoliation signalling pathways. *Plant, Cell & Environment* **33**, 48-58.
- Kebrom TH, Mullet JE.** 2015. Photosynthetic leaf area modulates tiller bud outgrowth in sorghum. *Plant, Cell & Environment* **38**, 1471-1478.
- Kebrom TH, Mullet JE.** 2016. Transcriptome profiling of tiller buds provides new insights into PhyB regulation of tillering and indeterminate growth in sorghum. *Plant Physiology* **170**, 2232-2250.
- Keller T, Abbott J, Moritz T, Doerner P.** 2006. Arabidopsis REGULATOR OF AXILLARY MERISTEMS1 controls a leaf axil stem cell niche and modulates vegetative development. *The Plant Cell* **18**, 598-611.
- Kelly G, David-Schwartz R, Sade N, Moshelion M, Levi A, Alchanatis V, Granot D.** 2012. The pitfalls of transgenic selection and new roles of AtHXK1: a high level of AtHXK1 expression uncouples hexokinase1-dependent sugar signaling from exogenous sugar. *Plant Physiology* **159**, 47-51.

- Kurakawa T, Ueda N, Maekawa M, Kobayashi K, Kojima M, Nagato Y, Sakakibara H, Kyojuka J.** 2007. Direct control of shoot meristem activity by a cytokinin-activating enzyme. *Nature* **445**, 652-655.
- Li X, Qian Q, Fu Z, et al .** 2003. Control of tillering in rice. *Nature* **422**, 618-621.
- Livak KJ, Schmittgen TD.** 2001. Analysis of relative gene expression data using real-time quantitative PCR and the  $2^{-\Delta\Delta CT}$  method. *Methods* **25**, 402-408.
- López-Ráez JA, Kohlen W, Charnikhova T, et al.** 2010. Does abscisic acid affect strigolactone biosynthesis? *New Phytologist* **187**, 343-354.
- Ma C, Sun Z, Chen C, Zhang L, Zhu S.** 2014. Simultaneous separation and determination of fructose, sorbitol, glucose and sucrose in fruits by HPLC-ELSD. *Food Chemistry* **145**, 784-788.
- Main CL, Beeler JE, Robinson DK, Mueller TC.** 2006. Growth, reproduction, and management of Chinese yam (*Dioscorea oppositifolia*). *Weed Technology* **20**, 773-777.
- Mason MG, Ross JJ, Babst BA, Wienclaw BN, Beveridge CA.** 2014. Sugar demand, not auxin, is the initial regulator of apical dominance. *Proceedings of the National Academy of Sciences of the United States of America* **111**, 6092-6097.
- Mizuki I, Takahashi A.** 2009. Secondary dispersal of *Dioscorea japonica* (Dioscoreaceae) bulbils by rodents. *Journal of Forestry Research* **14**, 95-100.
- Mravec J, Kubeš M, Bielach A, Gaykova V, Petrášek J, Skůpa P, Chand S, Benková E, Zažímalová E, Friml J.** 2008. Interaction of PIN and PGP transport mechanisms in auxin distribution-dependent development. *Development* **135**, 3345-3354.
- Murty YS.** 1983. Morphology, anatomy and development of bulbil in some Dioscoreas. *Proceedings: Plant Sciences* **92**, 443-449.
- Naz AA, Raman S, Martinez CC, Sinha NR, Schmitz G, Theres K.** 2013. Trifoliolate encodes an MYB transcription factor that modulates leaf and shoot architecture in tomato. *Proceedings of the National Academy of Sciences of the United States of America* **110**, 2401-2406.
- O'Hara LE, Paul MJ, Wingler A.** 2013. How do sugars regulate plant growth and development? New insight into the role of trehalose-6-phosphate. *Molecular Plant* **6**, 261-274.
- Perez-Rodriguez P, Riano-Pachon DM, Correa LGG, Rensing SA, Kersten B, Mueller-Roeber B.** 2010. PInTFDB: Updated content and new features of the plant transcription factor database. *Nucleic Acids Research* **38**, 822-827.
- Petrášek J, Friml J.** 2009. Auxin transport routes in plant development. *Development* **136**, 2675-2688.
- Prusinkiewicz P, Crawford S, Smith RS, Ljung K, Bennett T, Ongaro V, Leyser O.** 2009.

Control of bud activation by an auxin transport switch. Proceedings of the National Academy of Sciences of the United States of America **106**,17431-17436.

- Rabot A, Portemer V, Péron T, Mortreau E, Leduc N, Hamama L, Coutos-Thévenot P, Atanassova R, Sakr S, Le Gourrierec J.** 2014. Interplay of sugar, light and gibberellins in expression of *Rosa hybrida* vacuolar invertase 1 regulation. Plant and Cell Physiology **55**, 1734-1748.
- Reddy SK, Finlayson SA.** 2014. Phytochrome B promotes branching in Arabidopsis by suppressing auxin signaling. Plant Physiology **164**, 1542-1550.
- Reddy SK, Holalu SV, Casal JJ, Finlayson SA.** 2013. Abscisic acid regulates axillary bud outgrowth responses to the ratio of red to far-red light. Plant Physiology **163**, 1047-1058.
- Robinson MD, McCarthy DJ, Smyth GK.** 2010. EdgeR: a Bioconductor package for differential expression analysis of digital gene expression data. Bioinformatics **26**, 139-140.
- Roman H, Girault T, Barbier F, et al.** 2016. Cytokinins are initial targets of light in the control of bud outgrowth. Plant Physiology **172**, 489-509.
- Schluepmann H, Pellny T, van Dijken A, Smeekens S, Paul M.** 2003. Trehalose 6-phosphate is indispensable for carbohydrate utilization and growth in Arabidopsis thaliana. Proceedings of the National Academy of Sciences of the United States of America **100**, 6849-6854.
- Shimizu S, Mori H.** 1998. Analysis of cycles of dormancy and growth in pea axillary buds based on mRNA accumulation patterns of cell cycle-related genes. Plant and cell physiology **39**, 255-262.
- Siciliano V, Genre A, Balestrini R, Cappellazzo G, Pierre JGM, Bonfante P.** 2007. Transcriptome analysis of arbuscular mycorrhizal roots during development of the prepenetration apparatus. Plant Physiology **144**, 1455-1466.
- Tamiru M, Maass BL, Pawelzik E.** 2008. Characterizing diversity in composition and pasting properties of tuber flour in yam germplasm (*Dioscorea* spp.) from Southern Ethiopia. Journal of the Science of Food and Agriculture **88**,1675-1685.
- Trapnell C, Roberts A, Goff L, Pertea G, Kim D, Kelley DR, Pimentel H, Salzberg SL, Rinn SL, Pachter L.** 2012. Differential gene and transcript expression analysis of RNA-seq experiments with TopHat and Cufflinks. Nature Protocols **7**, 562-578.
- Turnbull CG, Raymond MA, Dodd IC, Morris SE.** 1997. Rapid increases in cytokinin concentration in lateral buds of chickpea (*Cicer arietinum* L.) during release of apical dominance. Planta **202**, 271-276.
- Verkest A, Manes C-L, Vercruyse S, Maes S, Van Der Schueren E, Beeckman T, Genschik P, Kuiper M, Inze D, De Veylder L.** 2005. The cyclin-dependent kinase inhibitor KRP2 controls the onset of the endoreduplication cycle during Arabidopsis

leaf development through inhibition of mitotic CDKA;1 kinase complexes. *The Plant Cell* **17**, 1723-1736.

- Wickham LD, Wilson LA, Passam HC.** 1982. The origin, development and germination of bulbils in two *Dioscorea* species. *Annals of Botany* **50**, 621-627.
- Wu ZG, Jiang W, Mantri N, Bao XQ, Chen SL, Tao ZM.** 2015. Transcriptome analysis reveals flavonoid biosynthesis regulation and simple sequence repeats in yam (*Dioscorea alata* L.) tubers. *BMC Genomics* **16**, 346.
- Xing M, Du Y, Wang X, Niu L, Chen X.** 2010. A simplified paraffin embedding method for small botanical samples. *Biotechnic & Histochemistry* **85**, 241-246.
- Xue YL, Miyakawa T, Nakamura A, Hatano KI, Sawano Y, Tanokura M.** 2015. Yam tuber storage protein reduces plant oxidants using the coupled reactions as carbonic anhydrase and dehydroascorbate reductase. *Molecular Plant* **8**, 1115-1118.
- Xue YL, Miyakawa T, Sawano Y, Tanokura M.** 2012. Cloning of genes and enzymatic characterizations of novel dioscorin isoforms from *Dioscorea japonica*. *Plant Science* **183**, 14-19.
- Yadav UP, Ivakov A, Feil R, et al.** 2014. The sucrose– trehalose 6-phosphate (Tre6P) nexus: specificity and mechanisms of sucrose signalling by Tre6P. *Journal of Experimental Botany* **65**, 1051-1068.
- Yang F, Wang Q, Schmitz G, Müller D, Theres K.** 2012. The bHLH protein ROX acts in concert with RAX1 and LAS to modulate axillary meristem formation in Arabidopsis. *The Plant Journal* **71**, 61-70.
- Yang M, Jiao Y.** 2016. Regulation of axillary meristem initiation by transcription factors and plant hormones. *Frontiers in Plant Science* **7**, 183.
- Yao C, Scott AF.** 2015. Abscisic acid is a general negative regulator of Arabidopsis axillary bud growth. *Plant Physiology* **169**, 611-626.
- Yu CP, Chen SCC, Chang YM, et al.** 2015. Transcriptome dynamics of developing maize leaves and genome wide prediction of cis elements and their cognate transcription factors. *Proceedings of the National Academy of Sciences of the United States of America* **112**, E2477-E2486.
- Zenoni S, Fasoli M, Tornielli GB, Dal Santo S, Sanson A, de Groot P, Sordo S, Citterio S, Pezzotti M.** 2011. Overexpression of PhEXPA1 increases cell size, modifies cell wall polymer composition and t in *Petunia hybrida*. *New Phytologist* **191**, 662-677.
- Zhao Y.** 2010. Auxin biosynthesis and its role in plant development. *Annual Review of Plant Biology* **61**, 49-64.
- Zheng C, Halaly T, Acheampong AK, Takebayashi Y, Jikumaru Y, Kamiya Y, Or E.** 2015. Abscisic acid (ABA) regulates grape bud dormancy, and dormancy release stimuli may act through modification of ABA metabolism. *Journal of Experimental Botany* **66**, 1527-1542.

## Figure legends

**Fig. 1.** Morphology of bulbil during key developmental Stages. **(A)** Bulbil phenotype. **(B)** Photographs of bulbil at the initiation (T1), early (T2), middle (T3) and mature stages (T4). **(C-F)** Paraffin sections of bulbils at T1 (C) , T2 (D), T3 (E), T4 (F) stages. The images show the zone of the junction region between bulbil and axil. G, Showing root primordia (RP). D, Showing meristematic zone (MZ). Bras: A and B, 1 cm; C, 500  $\mu\text{m}$ ; D to H, 200  $\mu\text{m}$ .

**Fig. 2.** Gene expression profiles in developing yam bulbils. **(A)** Principal component analysis for 12 bulbil samples shows four stage-specific groups based on all gene expression data. **(B)** Venn diagram shows the numbers of unique and overlapping expressed genes in bulbils among different developmental stages (T1-T4). **(C)** Number of up- and down-regulated genes between bulbil developmental stage comparisons.

**Fig. 3.** Expression profiles of DEGs involved in response to light, cell wall biosynthesis and modification, and cell cycle. The expression pattenen of genes related to these biological functions was significantly distinct among different stages. Each row of the heat map represents an individual genes. The gene expression level is standardized into Z-score and colored in red and blue for high and low expression (see "Materials and Methods").

**Fig. 4.** Sophisticated gene and metabolite regulation involved in carbohydrate pathways. **(A)** Schematic diagram of starch and sucrose (Suc) metabolsim, suggesting that the Suc biosynthesis pathway was highly up-rugulated at the early stage of bulbil outgrowth (T1). Heat maps next to the arrows represente the expression change of genes encoding corresponding enzymes for reactions. The expression level is standardized per gene into Z-score and colored in red and green for high and low expression. **(B)** Verfication of expression levels in genes encoding SUS1, CIN and TPS determined by qRT-PCR. **(C)** Sucrose accumulation in bulbils, demonstrating that sucrose is sharply required at the early stage of bulbil outgrowth (T1).

Data show the mean $\pm$ standard deviation (n=5). ADG, glucose-1-phosphate

adenyltransferase; ADPG, ADP glucose pyrophosphorylase; AMY,  $\alpha$ -amylase; A/N-INV, neutral/alkaline invertase; BAM,  $\beta$ -amylases; BG, glucan endo-1,3-beta-glucosidase; CIN, cell wall invertase; CINV, cytosolic invertase; DPE, 4-alpha-glucanotransferase; FRK, fructokinase; F6P, fructose 6-phosphate; GBSS, granule-bound starch synthase; GPIC, glucose-6-phosphate isomerase; GP, glycogen phosphorylase; G1P, glucose-1-phosphate; HK, hexokinase; ISA, isoamylase; Mos, malto-oligosaccharides; PGM, phosphoglucomutase; PGP, phosphoglucan phosphatase; PWD, phosphoglucan water dikinase; SBE, glucan-branching enzyme; SPS, sucrose-phosphate synthase; S6P, sucrose 6-phosphate; SS, starch synthase; SUC, sucrose synthase; TPS, trehalose-phosphate synthase; UDPG, UDP-galactose.

**Fig. 5.** The regulatory framework of auxin-related genes. Hierarchical clustering of expressed genes involved in auxin biosynthesis and catabolism (**A**), transport (**B**), and signaling (**C**), suggested that most genes were up-regulated at the early stage of bulbil outgrowth (T1). The expression level is standardized per gene into Z-score and colored in red and green for high and low expression.

**Fig. 6.** Expression profiles of transcription factors (TFs). Hierarchical clustering separated all differentially expressed TFs into four groups, indicating four stage-specific expression patterns. The TF families listed in the right of every group shows predominantly expressed in this group. The individual number represents the amount of member from TF families in the group. The gene expression level is standardized into Z-score and colored in yellow and blue for high and low expression.

**Fig. 7.** RNA in situ hybridization for MYB, WRKY and NAC transcription factors. Three transcription factors showed strongly accumulation in the AM initiation zone at the early stage of bulbil outgrowth (T1) (A, E, I). Bars=100  $\mu$ m.



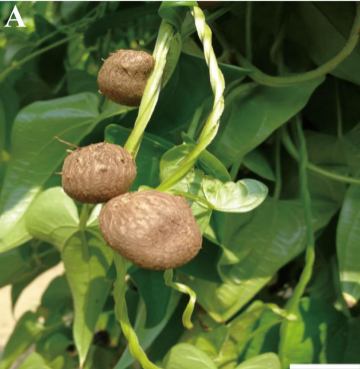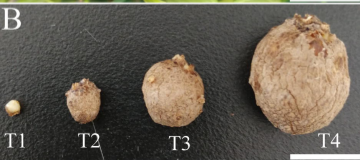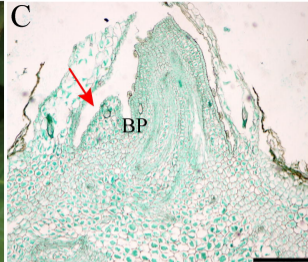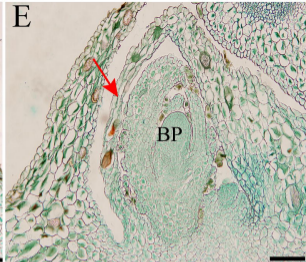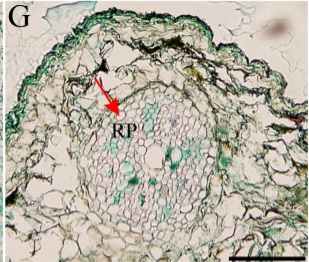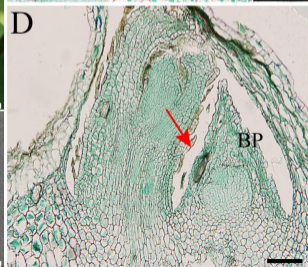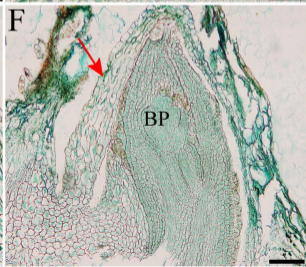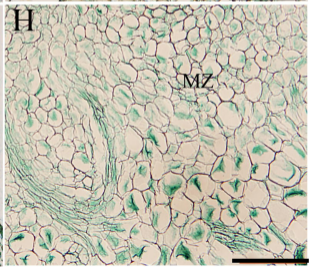



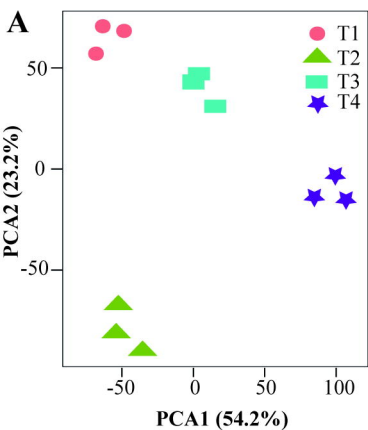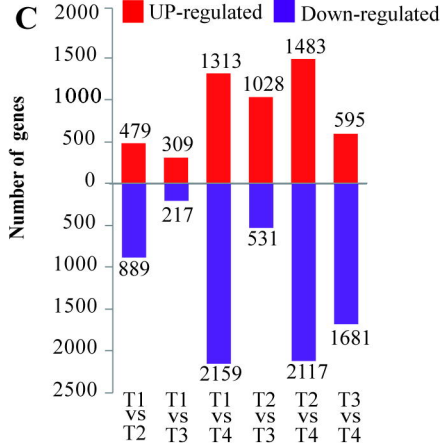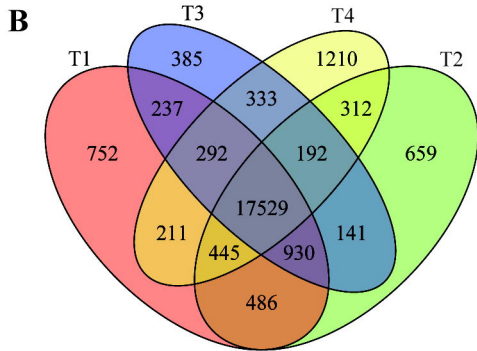

Response to light

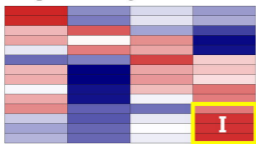

Cell wall modification

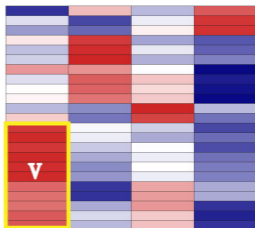

Circadian rhythm

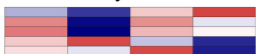

Cell wall lossening

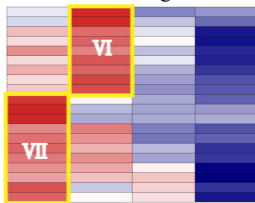

Cell wall biosynthesis

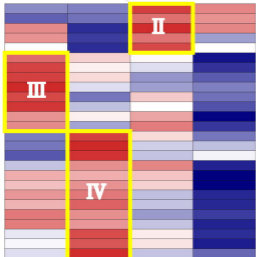

Cell cycle

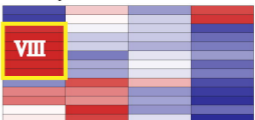

T1 T2 T3 T4

T1 T2 T3 T4

-1 -0.5 0 0.5 1

Row Z-score

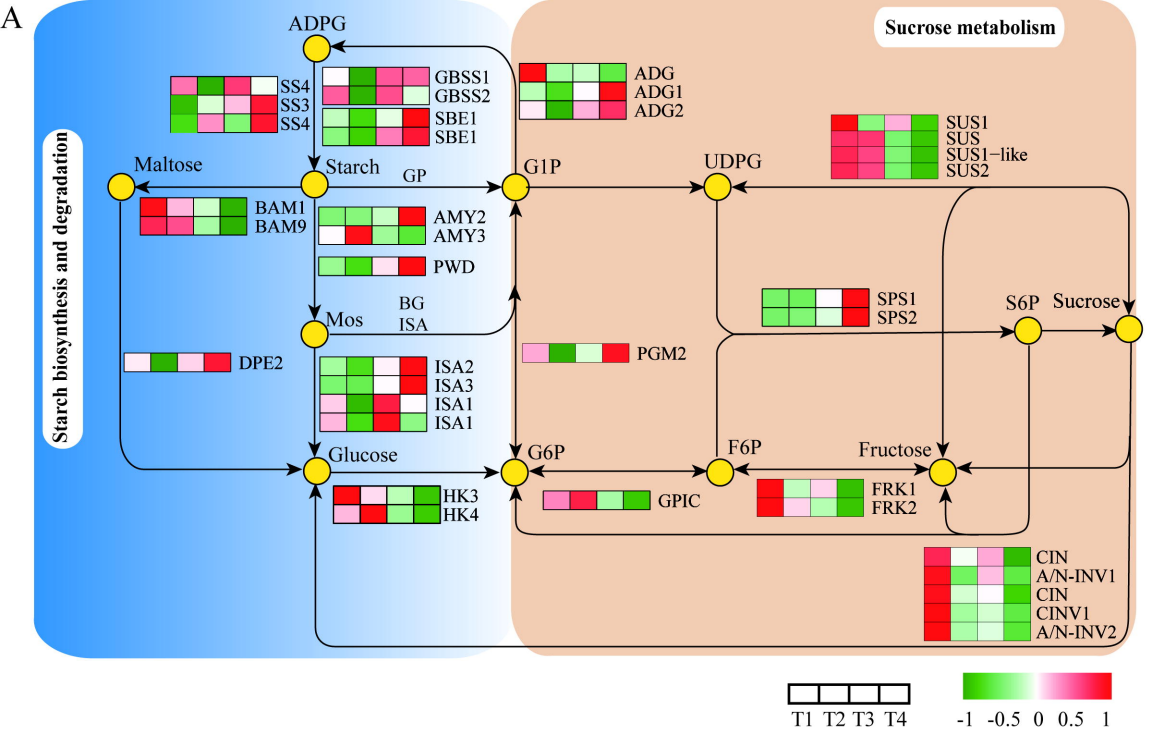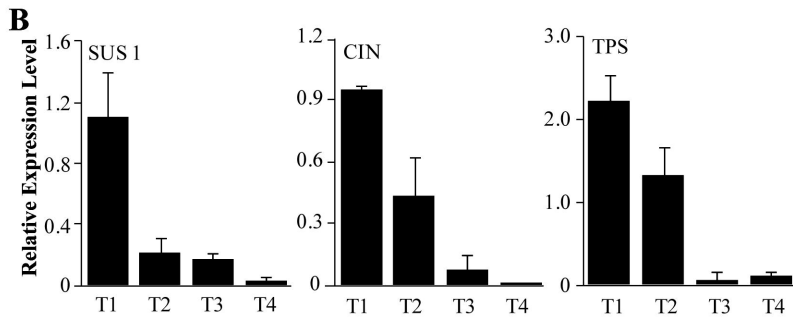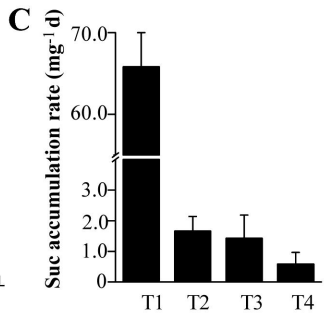

### A Auxin biosynthesis and catabolism

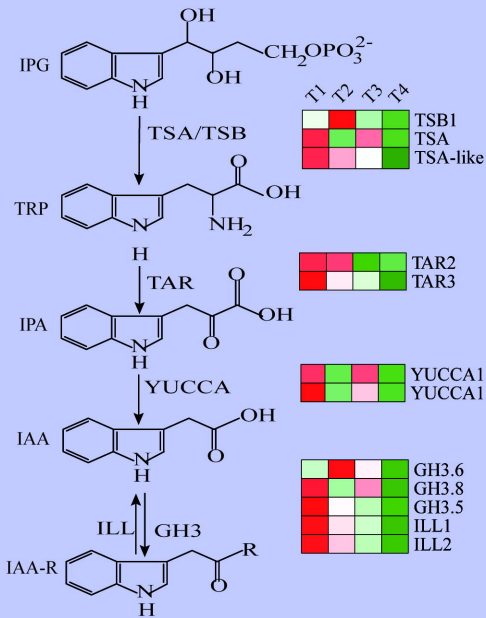

### B Auxin transport

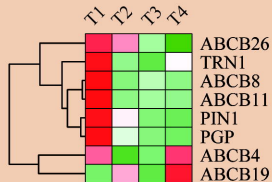

### C Auxin signaling

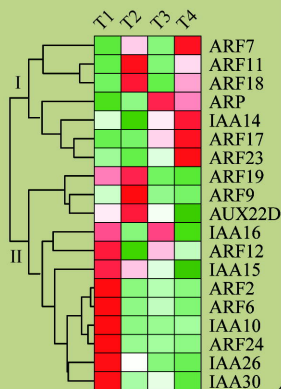

Row Z-score

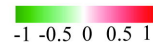



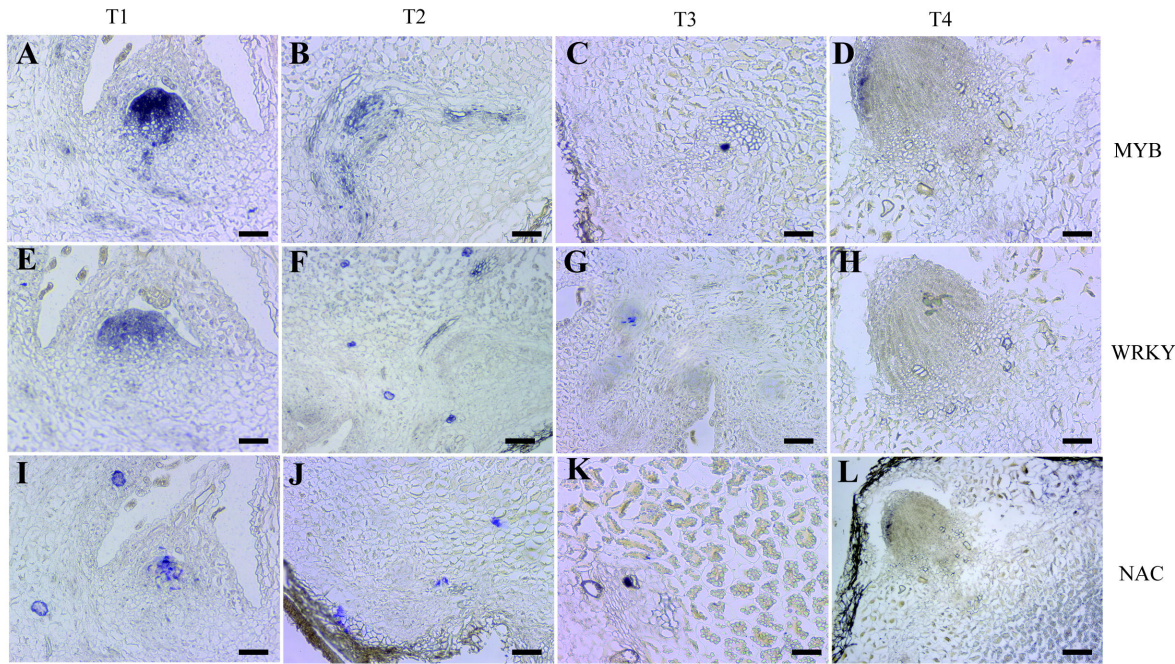

Source: https://www.biorxiv.org/content/10.1101/585364v1.full.pdf
